# Supplementary material
Source: Springer Nature journal article supplement (https://www.springermedizin.de/resource/supplementary/12943_2003_46_MOESM14_ESM.pdf/9553318)

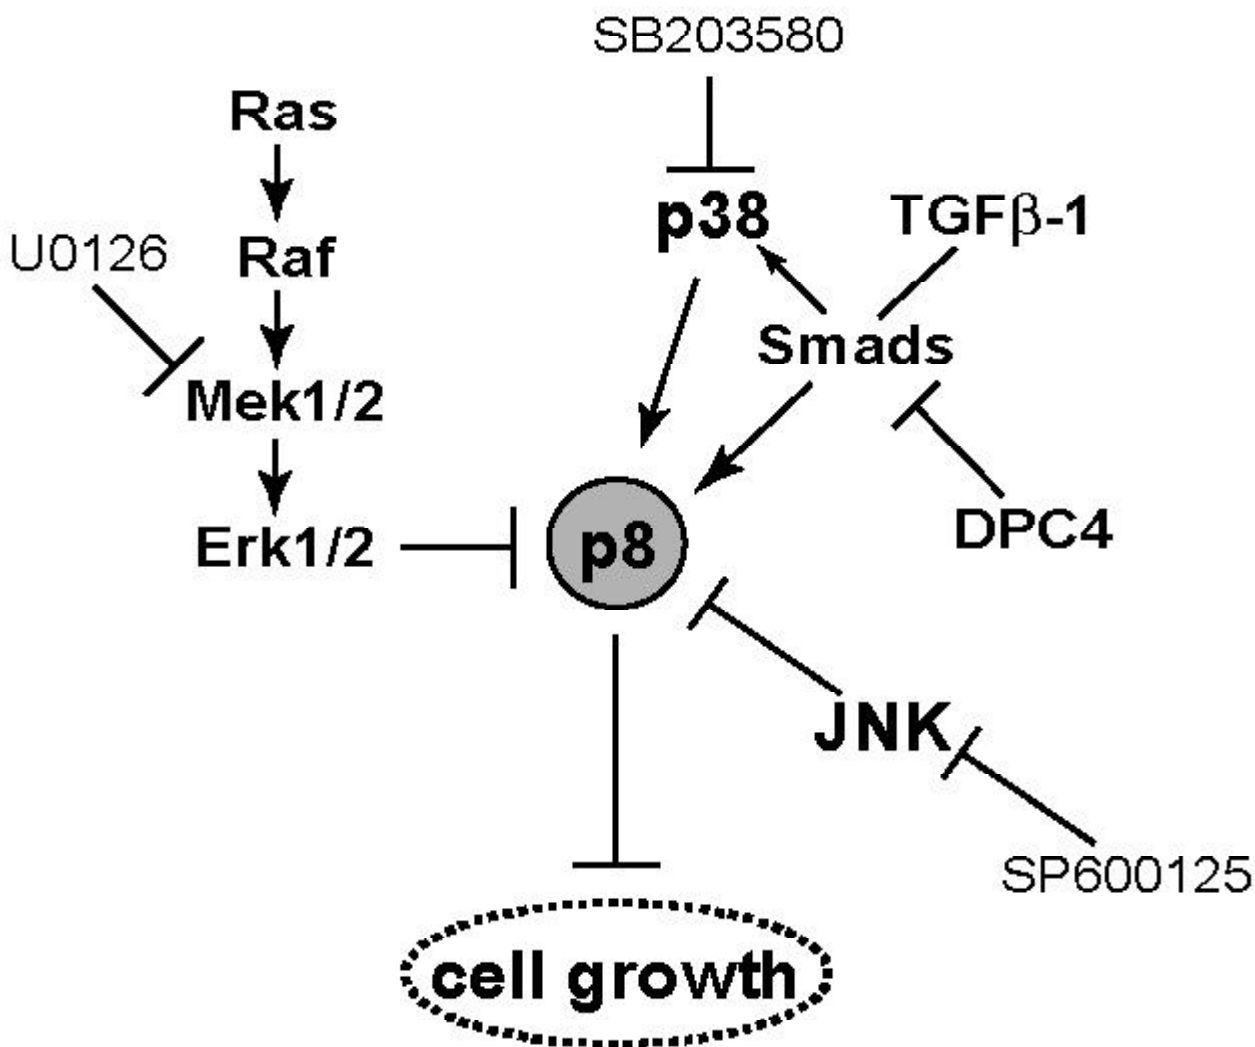

Supplement: MOESM14 [file 9553318]
